# Supplementary material for: Association of Direct-Acting Antiviral Therapy for Hepatitis C With After-Treatment Costs Among Medicare Beneficiaries
Source: PubMed Central journal article supplement (PMC7327546; doi:10.1001/jamanetworkopen.2020.8081), 2020-06-30
Supplement: jamanetwopen-3-e208081-s001.pdf [file jamanetwopen-3-e208081-s001.pdf]

## Supplementary Online Content

Jung J, Feldman R, Kalidindi Y, Riley T III. Association of direct-acting antiviral therapy for hepatitis C with after-treatment costs among Medicare beneficiaries. *JAMA Netw Open*. 2020;3(6): e208081. doi:10.1001/jamanetworkopen.2020.8081

**eAppendix 1.** Diagnosis Codes Used to Identify Hepatitis C Virus (HCV) and HCV-Related Liver Disease

**eAppendix 2.** Definition of the Completion of Treatment

**eAppendix 3.** Details of Regression Specification

**eFigure.** Index Date and Definition of Study Periods

**eTable 1.** Definition and Data Sources of the Covariates and Outcomes Used in the Study

**eTable 2.** Results From Logit Regression for Propensity Score (Cirrhosis Group)

**eTable 3.** Results From Logit Regression for Propensity Score (Non-Cirrhosis Group)

**eTable 4.** Patient Characteristics of Matched and Unmatched DAA Non-Users

**eTable 5.** Unadjusted Spending Over Time and Death Rates Between DAA Users and Non-Users

**eTable 6.** Results from Regression With Patients That Survived During Follow-Up

**eTable 7.** Unadjusted Spending Among DAA Users by Time-to-Treatment

**eTable 8.** Adjusted Outcomes Associated With DAA Use by Time to Treatment from HCV Diagnosis (by Cirrhosis)

This supplementary material has been provided by the authors to give readers additional information about their work.

## **eAppendix 1. Diagnosis Codes Used to Identify Hepatitis C Virus (HCV) and HCV-Related Liver Disease**

### **Diagnosis codes**

Chronic Hepatitis C Virus (HCV):

ICD-9-CM codes: 070.44, 070.54, 070.70, 070.71

ICD-10-CM codes: B18.2, B19.20, B19.21

HCV related liver disease:

ICD-9-CM codes: 571.5, 571.4, 571.41, 571.49, 571.8, 571.9, 573.1, 573.3, 573.9, 572.8, 572.4, V42.7, 456.2, 573.8, 155.0, 567.23, 782.4, 572.3, 572.2, 789.5, V02.69, V02.60, 707.9, 70.6

ICD-10-CM codes: K74.0, K74.60, K74.69, K73.9, K73.0, K73.2, K83.8, K76.0, K76.89, K74.1, K76.9, K77, K716, K75.9, K76.9, K72.10, K72.90, K76.7, Z94.4, I85.0, K76.1, K76.89, C22.0, C22.7, C22.8, K65.2, R17, K76.6, K72.90, K72.91, R18.0, R18.8, B18.8, B18.9, L98.499, B19.0

### **Algorithm used to identify patients with hepatitis C virus**

We identified patients with hepatitis C following the standard algorithm used by the Centers for Medicare and Medicaid Services (CMS): having at least 1 inpatient or skilled nursing facility claim; OR 2 hospital outpatient or carrier (physician service) claims of hepatitis C based on International Classification of Diagnosis (ICD) codes for HCV listed in the table above.

To identify newly diagnosed HCV patients, a one-year washout period was required – i.e., the patient should not have had any claim with HCV diagnosis in the prior year.

## eAppendix 2. Definition of the Completion of Treatment

We used Medicare Prescription Drug Event (PDE) files to identify initiation of 1 of the following direct-acting antivirals (DAAs): elbasvir/grazoprevir, ledipasvir/sofosbuvir, ombitasvir/paritaprevir/ritonavir plus dasabuvir, sofosbuvir, and sofosbuvir/velpatasvir. The National drug codes or NDCs (a 11-digit unique numeric drug identifier created by Centers for Medicare and Medicaid Services) used to identify these drugs are listed below:

NDCs: 00006307401, 00006307402, 00074309328, 61958150101, 61958180101, 61958220101

All DAAs except sofosbuvir are administered as monotherapy or in combination with ribavirin. Sofosbuvir is concomitantly used with peginterferon, ribavirin, simeprevir, or daclatasvir.

DAA regimens vary by genotype and prior HCV treatment experience, which could not be identified from Medicare claims. However, the recommended duration of therapy indicated by package inserts is 12 weeks for most patients regardless of DAA regimen. For patients who have prior experience with other HCV treatments, the recommended treatment duration is 24 weeks (16 weeks for elbasvir/grazoprevir).

Results of recent randomized trials for patients without cirrhosis showed that 8-week treatments are effective for elbasvir/grazoprevir, ledipasvir/sofosbuvir, and ombitasvir/paritaprevir/ritonavir plus dasabuvir.<sup>1-3</sup> For these 3 DAAs, we required 8 weeks of treatment for patients without cirrhosis and 12 weeks for those with cirrhosis. For other DAAs, we applied 12 weeks to patients with and without cirrhosis. If patients filled prescriptions for more than 12 weeks (ie, patients were on regimens with expected duration >12 weeks), we applied 16 weeks for elbasvir/grazoprevir and 24 weeks for all other DAAs based on each drug's package insert. We considered an interval between fills of fewer than 60 days as continuation of the therapy.

## eReferences

1. Vierling JM, Kugelmas M, Lawitz E, et al. Efficacy of an eight-week regimen of grazoprevir plus elbasvir with and without ribavirin in treatment-naive, noncirrhotic HCV genotype 1B infection. *J Hepatol*. 2015;62(suppl2):S618. doi: 10.1016/S0168-8278(15)30972-7.
2. Kowdley KV, Gordon SC, Reddy KR, et al; ION-3 Investigators. Ledipasvir and sofosbuvir for 8 or 12 weeks for chronic HCV without cirrhosis. *N Engl J Med*. 2014;370(20):1879-1888. doi: 10.1056/NEJMoa1402355.
3. Welzel TM, Asselah T, Dumas EO, et al. Ombitasvir, paritaprevir, and ritonavir plus dasabuvir for 8 weeks in previously untreated patients with hepatitis C virus genotype 1b infection without cirrhosis (GARNET): a single-arm, open-label, phase 3b trial. *Lancet Gastroenterol Hepatol*. 2017;2(7):494-500. doi: 10.1016/S2468-1253(17)30071-7.

### eAppendix 3. Details of Regression Specification

We estimated the multivariate regression at the person-period level to examine the association of DAA treatment with follow-up medical costs. The regression model is written as:

$$Y_{it} = \alpha + b(\text{FOLLOW\_TIME})_i + \lambda(\text{DAA})_t + \theta(\text{FOLLOW\_TIME} * \text{DAA})_{it} + n(\text{PATIENT\_RISK})_{it} + \varepsilon_{it} \quad (1)$$

where  $i$  denotes the patient and  $t$  is time at 6-month intervals. Time  $t$  equals 0 for the pre-treatment period; and 1 for 6 months, 2 for 6-12 months, 3 for 12-18 months, 4 for 18-24 months, and 5 for 24-30 months after the completion of treatment.  $Y_{it}$  is the study outcome (total medical cost or HCV/liver cost) for patient  $i$  at time  $t$ .

$\text{FOLLOW\_TIME}_t$  denotes five indicators that represent each follow-up period after the completion of treatment. These indicators control for a common time trend over the follow-up periods.  $\text{DAA}_i$  is an indicator variable that equals 1 if patient  $i$  completed DAA treatment and 0 otherwise. This variable controls for permanent differences between DAA users and DAA non-users, such as high-risk status of non-users prior to treatment.

The interaction terms between  $\text{FOLLOW\_TIME}$  and  $\text{DAA}$  are of interest. The coefficients on those interaction terms,  $\theta$ , measure the mean adjusted difference between DAA users and non-users in changes in the outcome (costs) from the pre-treatment to each follow-up periods (6 months, 6-12 months, 12-18 months, 18-24 months, and 24-30 months after the completion of treatment).

$\text{PATIENT\_RISK}_{it}$  denotes the following characteristics for patient  $i$  at time  $t$ : age, gender, race, HIV/AIDS infection, having cancer, having substance use disorder, having kidney diseases, having hypertension, having diabetes, having cardiovascular diseases, having arthritis, having lung diseases, having anemia, and having eye diseases.  $\varepsilon_{it}$  are error terms, we clustered

- Estimation

We estimated this regression in a propensity-score matched sample (based on the nearest neighbor one-to-one matching with 0.1 caliper). We used a Generalized Linear Model (GLM) with a log link and the gamma distribution to account for the skewed distribution of the cost variables (the outcomes).\* We estimated the model separately for patients with and without cirrhosis to allow heterogeneity in the associations of DAA use and all covariates with follow-up costs between those two groups.

- Calculation of cumulative cost reduction

The unit of analysis was a person-period (at 6-month intervals). The analysis allowed the number of follow-up periods to differ by patient because patients were followed up from DAA treatment to the end of study or death. For example, patients who completed DAA therapy in early 2015 were followed up 30 months (the maximum), while those with DAA treatment in 2016 were followed up 12 months. With this unbalanced data structure, it was not necessary to impute zero for those with fewer than 30 months follow-up, which would artificially inflate or deflate costs. We calculated cumulative effects from the regression results as the sum of cost reductions over all 6-month follow-up periods (i.e., the sum of the coefficients on the interaction terms,  $\theta$ ).

**eFigure.** Index Date and Definition of Study Periods

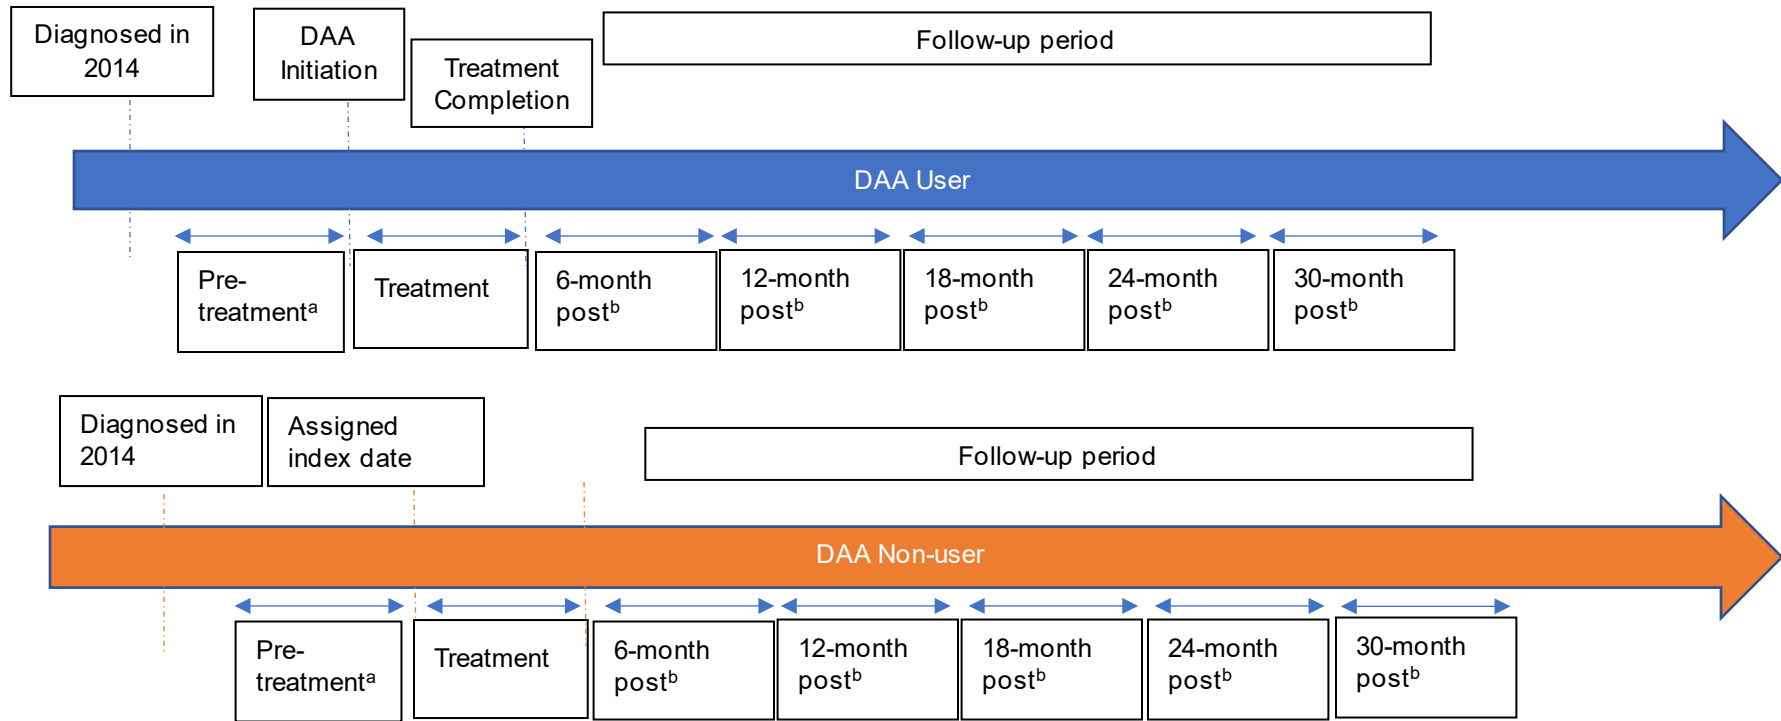

Abbreviations: DAA, Direct-acting antiviral drug;

<sup>a</sup> Pre-treatment among users refers to the 6-month period prior to initiation of DAAs among users, and among non-users it refers to the 6-month period prior to the assigned index date.

<sup>b</sup> Post refers periods after completion of DAA therapy among users, and among non-users it refers to the period after hypothetical treatment.

**eTable 1.** Definition and Data Sources of the Covariates and Outcomes Used in the Study

|                             | <b>Definition</b>                                                                                               | <b>Data Source</b>                                                                                                                                                                                                                                                                               |
|-----------------------------|-----------------------------------------------------------------------------------------------------------------|--------------------------------------------------------------------------------------------------------------------------------------------------------------------------------------------------------------------------------------------------------------------------------------------------|
| <b>Patient demographics</b> |                                                                                                                 |                                                                                                                                                                                                                                                                                                  |
| Age                         | Binary variables that indicate whether a patient's age was less than 65, 65-69,70-74, and 75 or above           | Medicare MBSF file                                                                                                                                                                                                                                                                               |
| Gender                      | Binary indicator that indicates whether a patient was female                                                    | Medicare MBSF file                                                                                                                                                                                                                                                                               |
| Race                        | Binary variables that indicates whether a patient was White, African American, Hispanic, or other/unknown race. | Medicare MBSF file                                                                                                                                                                                                                                                                               |
| <b>Health Risks</b>         |                                                                                                                 |                                                                                                                                                                                                                                                                                                  |
| Cirrhosis                   | Binary indicator that indicates whether a patient had cirrhosis                                                 | Constructed by applying the standard CCW algorithm criteria (1 inpatient visit or 2 outpatient/carrier visits) to Medicare Part A and Part B claims file (ICD9 DX codes - 571.5, ICD10 DX codes -K74.0, K74.60, K74.69)                                                                          |
| Decompensated cirrhosis     | Binary indicator that indicates whether a patient had decompensated cirrhosis                                   | If patient had an indicator for cirrhosis (created above) and at least one claim for liver-related symptoms in Medicare Part A or Part B claims file (ICD9 DX codes -789.51, 789.59, 572.2, 572.3, 782.4, 567.23, 572.4, ICD10 DX codes -R18.0, R18.8, K72.90, K72.91, K76.6 ,R17, K65.2, K76.7) |
| Compensated cirrhosis       | Binary indicator that indicates whether a patient had compensated cirrhosis                                     | If patient had an indicator for cirrhosis (created above) and no claims for liver-related symptoms in Medicare Part A or Part B claims file (ICD9 DX codes -789.51, 789.59, 572.2, 572.3, 782.4, 567.23, 572.4, ICD10 DX codes -R18.0, R18.8, K72.90, K72.91, K76.6 ,R17, K65.2, K76.7)          |
| HIV/AIDS                    | Binary indicator of whether the patient had HIV/AIDS                                                            | Medicare MBSF file - other chronic conditions <sup>a</sup>                                                                                                                                                                                                                                       |
|                             |                                                                                                                 |                                                                                                                                                                                                                                                                                                  |

|                                   | <b>Definition</b>                                                                                             | <b>Data Source</b>                                                                                                                                                                                                    |
|-----------------------------------|---------------------------------------------------------------------------------------------------------------|-----------------------------------------------------------------------------------------------------------------------------------------------------------------------------------------------------------------------|
| Hepatocellular cancer             | Binary indicator of whether the patient had Liver/Hepatocellular cancer                                       | Constructed by applying the standard CCW algorithm criteria (1 inpatient visit or 2 outpatient/carrier visits) to Medicare Part A and Part B claims file (ICD9 DX codes - 155.0, ICD10 DX codes -C22.0)               |
| Anemia                            | Binary indicator of whether the patient had anemia                                                            | Medicare MBSF file - CCW Chronic conditions <sup>a</sup>                                                                                                                                                              |
| Lung Disease                      | Binary indicator of whether the patient had lung disease                                                      | Combining Asthma and COPD indicators available in Medicare MBSF file - CCW Chronic conditions <sup>a</sup>                                                                                                            |
| Cancer                            | Binary indicator of whether the patient had cancer                                                            | Combining breast, lung, colon, prostate, hyperplasia indicators available in Medicare MBSF file - CCW Chronic conditions <sup>a</sup>                                                                                 |
| Cardiac disease                   | Binary indicator of whether the patient had cardiac disease                                                   | Combining lipedema, hypertension, atrial fibrillation, ischemic heart disease, heart failure, acute myocardial infarction, and stroke indicators available in Medicare MBSF file- CCW Chronic conditions <sup>a</sup> |
| Dementia                          | Binary indicator of whether the patient had dementia                                                          | Medicare MBSF file - CCW Chronic conditions <sup>a</sup>                                                                                                                                                              |
| Psychiatric conditions            | Binary indicator of whether the patient had psychiatric conditions                                            | Combining depression, anxiety, and bipolar indicators available in Medicare MBSF file- CCW Chronic conditions and other chronic conditions file <sup>a</sup>                                                          |
| Diabetes                          | Binary indicator of whether the patient had diabetes                                                          | Medicare MBSF file - CCW Chronic conditions <sup>a</sup>                                                                                                                                                              |
| Eye disease                       | Binary indicator of whether the patient had eye disease                                                       | Combining glaucoma and cataract indicators available in Medicare MBSF file- CCW Chronic conditions <sup>a</sup>                                                                                                       |
| Kidney disorders                  | Binary indicator of whether the patient had kidney disorders                                                  | Medicare MBSF file - CCW Chronic conditions <sup>a</sup>                                                                                                                                                              |
| Drug and alcohol related disorder | Binary indicator of whether the patient had drug or alcohol related disorder                                  | Combining alcohol use disorders and drug use disorders indicators available in Medicare MBSF file- other chronic conditions file <sup>a</sup>                                                                         |
| Pre-treatment spending            | Inflation-adjusted all-cause Medicare allowed payments <sup>b</sup> made during 6 months prior to index date. | Medicare provider analysis and review (MedPAR) file containing inpatient hospital and SNF claims, Medicare Hospital Outpatient file and Carrier file.                                                                 |
|                                   |                                                                                                               |                                                                                                                                                                                                                       |
|                                   |                                                                                                               |                                                                                                                                                                                                                       |

|                                              | <b>Definition</b>                                                                                                                                                                                                                      | <b>Data Source</b>                                                                                                                                        |
|----------------------------------------------|----------------------------------------------------------------------------------------------------------------------------------------------------------------------------------------------------------------------------------------|-----------------------------------------------------------------------------------------------------------------------------------------------------------|
| <b>Outcomes</b><br>Hepatitis C related costs | Inflation-adjusted, hepatitis C related, Medicare allowed payments <sup>b</sup> made during each 6-month following the completion of treatment. The ICD codes used to identify hepatitis C related visits are provided in eAppendix 1. | Medicare provider analysis and review (MedPAR) file containing inpatient hospital and SNF claims, and Medicare Hospital Outpatient file and Carrier file. |
| Total medical costs                          | Inflation-adjusted all-cause Medicare allowed payments <sup>b</sup> made during each 6-month following the completion of treatment                                                                                                     | Medicare provider analysis and review (MedPAR) file containing inpatient hospital and SNF claims, and Medicare Hospital Outpatient file and Carrier file. |

Abbreviations: AIDS, Acquired immunodeficiency syndrome; CCW, CMS chronic conditions data warehouse; COPD, Chronic obstructive pulmonary disease; ESRD, End-stage renal disease; HIV, Human immunodeficiency virus; MBSF, Master beneficiary summary file; SNF, Skilled nursing facility;

<sup>a</sup> The diagnosis codes used by Medicare to identify these conditions are available at <https://www2.ccwdata.org/web/guest/condition-categories>

<sup>b</sup>The allowed payments included both Medicare reimbursements, patient responsibilities, and third party payments. In the MedPAR file, the allowed payment was calculated as the sum of all beneficiary payments including deductibles and coinsurance, and Medicare payments made for the claim, and any payment made by third party payers. The allowed payments were calculated similarly in the Medicare hospital outpatient file. In the carrier file, a single variable for allowed payments was available.



**eTable 2.** Results From Logit Regression for Propensity Score (Cirrhosis Group)<sup>a</sup>

| Variables                         | Users that initiated DAAs 30-36 months after diagnosis |         | Users that initiated DAAs 24-30 months after diagnosis |         | Users that initiated DAAs 18-24 months after diagnosis |         | Users that initiated DAAs 12-18 months after diagnosis |         | Users that initiated DAAs 6-12 months after diagnosis |         |
|-----------------------------------|--------------------------------------------------------|---------|--------------------------------------------------------|---------|--------------------------------------------------------|---------|--------------------------------------------------------|---------|-------------------------------------------------------|---------|
|                                   | N=1,024                                                |         | N=1,734                                                |         | N=1,865                                                |         | N=1,979                                                |         | N=2,380                                               |         |
|                                   | Coeff.                                                 | P Value | Coeff.                                                 | P Value | Coeff.                                                 | P Value | Coeff.                                                 | P Value | Coeff.                                                | P Value |
| Age 65-70                         | -0.10                                                  | 0.79    | 0.35                                                   | 0.05    | -0.04                                                  | 0.83    | 0.24                                                   | 0.11    | 0.33                                                  | 0.02    |
| Age 70-75                         | -0.76                                                  | 0.14    | -0.16                                                  | 0.49    | -0.44                                                  | 0.05    | -0.35                                                  | 0.08    | -0.33                                                 | 0.09    |
| Age >75                           | 0.27                                                   | 0.54    | -0.16                                                  | 0.55    | -0.47                                                  | 0.05    | -0.45                                                  | 0.05    | -1.14                                                 | <0.001  |
| Female                            | -0.23                                                  | 0.44    | -0.36                                                  | 0.02    | -0.13                                                  | 0.38    | -0.39                                                  | <0.001  | -0.08                                                 | 0.47    |
| African American                  | 0.63                                                   | 0.09    | 0.56                                                   | <0.001  | 0.77                                                   | <0.001  | 0.76                                                   | <0.001  | 0.63                                                  | <0.001  |
| Hispanic                          | -0.65                                                  | 0.39    | -0.45                                                  | 0.23    | -0.62                                                  | 0.11    | -0.90                                                  | 0.01    | -0.32                                                 | 0.17    |
| Other                             | -0.68                                                  | 0.36    | -0.28                                                  | 0.41    | 0.21                                                   | 0.45    | -0.01                                                  | 0.97    | -0.11                                                 | 0.65    |
| Decompensated Cirrhosis           | 0.44                                                   | 0.14    | -0.12                                                  | 0.45    | -0.25                                                  | 0.10    | -0.12                                                  | 0.34    | -0.17                                                 | 0.14    |
| HIV/AIDS                          | -1.23                                                  | 0.24    | -0.33                                                  | 0.35    | -0.48                                                  | 0.20    | -0.34                                                  | 0.29    | -0.32                                                 | 0.26    |
| Hepatocellular cancer             | 0.05                                                   | 0.93    | 0.27                                                   | 0.31    | -0.81                                                  | 0.01    | -0.11                                                  | 0.61    | -0.49                                                 | 0.03    |
| Anemia                            | -0.96                                                  | <0.001  | -0.44                                                  | 0.01    | -0.20                                                  | 0.19    | -0.56                                                  | <0.001  | -0.75                                                 | <0.001  |
| Lung Disease                      | -0.21                                                  | 0.49    | -0.35                                                  | 0.03    | -0.27                                                  | 0.08    | -0.36                                                  | 0.01    | -0.59                                                 | <0.001  |
| Cancer                            | -0.05                                                  | 0.90    | 0.17                                                   | 0.38    | 0.20                                                   | 0.29    | -0.50                                                  | 0.01    | -0.13                                                 | 0.45    |
| Cardiac disease                   | 0.70                                                   | 0.11    | 0.06                                                   | 0.77    | 0.18                                                   | 0.33    | -0.09                                                  | 0.56    | -0.20                                                 | 0.16    |
| Dementia                          | -1.77                                                  | 0.02    | -0.53                                                  | 0.03    | -0.81                                                  | <0.001  | -1.08                                                  | <0.001  | -1.14                                                 | <0.001  |
| Psychiatric conditions            | 0.02                                                   | 0.94    | 0.30                                                   | 0.06    | -0.22                                                  | 0.14    | -0.22                                                  | 0.08    | -0.08                                                 | 0.49    |
| Diabetes                          | 0.26                                                   | 0.36    | -0.04                                                  | 0.81    | -0.22                                                  | 0.14    | -0.18                                                  | 0.15    | -0.30                                                 | 0.01    |
| Eye disease                       | -0.31                                                  | 0.43    | -0.16                                                  | 0.40    | -0.10                                                  | 0.58    | -0.13                                                  | 0.39    | 0.11                                                  | 0.43    |
| Kidney disorders                  | -0.21                                                  | 0.50    | -0.56                                                  | <0.001  | -0.47                                                  | <0.001  | -0.36                                                  | 0.01    | -0.71                                                 | <0.001  |
| Drug and alcohol related disorder | -0.22                                                  | 0.49    | -0.24                                                  | 0.13    | -0.49                                                  | <0.001  | -0.68                                                  | <0.001  | -1.09                                                 | <0.001  |
| Bone disease                      | 0.04                                                   | 0.87    | -0.05                                                  | 0.73    | 0.02                                                   | 0.91    | -0.08                                                  | 0.51    | -0.03                                                 | 0.79    |
| ESRD                              | -0.37                                                  | 0.62    | 0.93                                                   | <0.001  | -0.29                                                  | 0.43    | -1.30                                                  | <0.001  | -1.50                                                 | <0.001  |
| Prior 6-month costs               | 0.00                                                   | 0.66    | 0.00                                                   | 0.57    | 0.00                                                   | 0.54    | 0.00                                                   | 0.94    | 0.00                                                  | 0.03    |

Abbreviations: AIDS, Acquired immunodeficiency syndrome; Coeff, Coefficient; DAA, Direct-acting antiviral drug; ESRD, End-stage renal disease; HIV, Human immunodeficiency virus;

<sup>a</sup> Propensity scores were calculated using users in each of the initiation categories and non-users that could be followed up for at least one 6-month follow-up period after the hypothetical treatment date assigned using prescription-time matching in each initiation category

**eTable 3.** Results From Logit Regression for Propensity Score (Non-Cirrhosis Group)<sup>a</sup>

| Variables                         | Users that initiated DAAs 30-36 months after diagnosis |         | Users that initiated DAAs 24-30 months after diagnosis |         | Users that initiated DAAs 18-24 months after diagnosis |         | Users that initiated DAAs 12-18 months after diagnosis |         | Users that initiated DAAs 6-12 months after diagnosis |         |
|-----------------------------------|--------------------------------------------------------|---------|--------------------------------------------------------|---------|--------------------------------------------------------|---------|--------------------------------------------------------|---------|-------------------------------------------------------|---------|
|                                   | Coeff.                                                 | P Value | Coeff.                                                 | P Value | Coeff.                                                 | P Value | Coeff.                                                 | P Value | Coeff.                                                | P Value |
|                                   | N=12,060                                               |         | N=19,916                                               |         | N=21,359                                               |         | N=22,272                                               |         | N=23,487                                              |         |
| Age 65-70                         | -0.02                                                  | 0.93    | 0.13                                                   | 0.24    | 0.26                                                   | <0.001  | 0.26                                                   | <0.001  | 0.29                                                  | <0.001  |
| Age 70-75                         | 0.03                                                   | 0.88    | -0.16                                                  | 0.25    | -0.18                                                  | 0.13    | -0.13                                                  | 0.18    | -0.24                                                 | 0.01    |
| Age >75                           | -0.54                                                  | 0.05    | -0.88                                                  | <0.001  | -0.65                                                  | <0.001  | -0.83                                                  | <0.001  | -1.08                                                 | <0.001  |
| Female                            | -0.09                                                  | 0.53    | -0.13                                                  | 0.11    | -0.03                                                  | 0.67    | -0.01                                                  | 0.90    | -0.06                                                 | 0.21    |
| African American                  | 0.53                                                   | <0.001  | 0.43                                                   | <0.001  | 0.37                                                   | <0.001  | 0.47                                                   | <0.001  | 0.47                                                  | <0.001  |
| Hispanic                          | -0.72                                                  | 0.16    | 0.40                                                   | 0.04    | -0.19                                                  | 0.34    | -0.21                                                  | 0.22    | -0.18                                                 | 0.20    |
| Other                             | -0.21                                                  | 0.52    | 0.02                                                   | 0.90    | -0.40                                                  | 0.03    | -0.43                                                  | <0.001  | -0.31                                                 | 0.01    |
| Decompensated Cirrhosis           | 0.42                                                   | 0.07    | 0.35                                                   | 0.02    | 0.59                                                   | <0.001  | 0.50                                                   | <0.001  | 0.22                                                  | 0.02    |
| HIV/AIDS                          | 1.17                                                   | 0.06    | 0.66                                                   | 0.21    | 0.46                                                   | 0.28    | 0.38                                                   | 0.29    | -0.06                                                 | 0.86    |
| Hepatocellular cancer             | -0.22                                                  | 0.18    | -0.10                                                  | 0.33    | -0.01                                                  | 0.94    | -0.01                                                  | 0.92    | -0.09                                                 | 0.11    |
| Anemia                            | -0.19                                                  | 0.23    | 0.04                                                   | 0.69    | -0.14                                                  | 0.07    | -0.27                                                  | <0.001  | -0.39                                                 | <0.001  |
| Lung Disease                      | 0.13                                                   | 0.52    | 0.10                                                   | 0.40    | 0.16                                                   | 0.12    | -0.12                                                  | 0.20    | 0.05                                                  | 0.53    |
| Cancer                            | 0.10                                                   | 0.56    | 0.11                                                   | 0.25    | -0.11                                                  | 0.17    | 0.14                                                   | 0.03    | -0.05                                                 | 0.34    |
| Cardiac disease                   | -0.64                                                  | 0.01    | -0.35                                                  | 0.02    | -0.76                                                  | <0.001  | -0.77                                                  | <0.001  | -1.12                                                 | <0.001  |
| Dementia                          | -0.04                                                  | 0.78    | -0.02                                                  | 0.86    | -0.16                                                  | 0.02    | -0.16                                                  | 0.01    | -0.15                                                 | <0.001  |
| Psychiatric conditions            | -0.01                                                  | 0.96    | -0.21                                                  | 0.03    | 0.02                                                   | 0.77    | -0.11                                                  | 0.09    | -0.11                                                 | 0.04    |
| Diabetes                          | 0.25                                                   | 0.16    | 0.10                                                   | 0.36    | 0.10                                                   | 0.26    | 0.27                                                   | <0.001  | 0.29                                                  | <0.001  |
| Eye disease                       | 0.51                                                   | <0.001  | -0.12                                                  | 0.25    | -0.18                                                  | 0.04    | -0.38                                                  | <0.001  | -0.53                                                 | <0.001  |
| Kidney disorders                  | 0.00                                                   | 0.98    | -0.12                                                  | 0.16    | -0.16                                                  | 0.02    | -0.40                                                  | <0.001  | -0.55                                                 | <0.001  |
| Drug and alcohol related disorder | 0.07                                                   | 0.63    | 0.18                                                   | 0.03    | 0.10                                                   | 0.13    | -0.06                                                  | 0.29    | 0.01                                                  | 0.83    |
| Bone disease                      | -0.03                                                  | 0.90    | 0.33                                                   | 0.06    | -0.04                                                  | 0.79    | -0.99                                                  | <0.001  | -1.45                                                 | <0.001  |
| ESRD                              | 0.00                                                   | 0.67    | 0.00                                                   | 0.78    | 0.00                                                   | 0.75    | 0.00                                                   | 0.51    | 0.00                                                  | 0.78    |
| Prior 6-month costs               | -0.02                                                  | 0.93    | 0.13                                                   | 0.24    | 0.26                                                   | <0.001  | 0.26                                                   | <0.001  | 0.29                                                  | <0.001  |

Abbreviations: AIDS, Acquired immunodeficiency syndrome; Coeff, Coefficient; DAA, Direct-acting antiviral drug; ESRD, End-stage renal disease; HIV, Human immunodeficiency virus;

<sup>a</sup> Propensity scores were calculated using users in each of the initiation categories and non-users that could be followed up for at least one 6-month follow-up period after the hypothetical treatment date assigned using prescription-time matching in each initiation category

**eTable 4.** Patient Characteristics of Matched and Unmatched DAA Non-Users

| Variable                          | Cirrhosis group                   |                                 |                      | Non-cirrhosis group                |                                 |                      |
|-----------------------------------|-----------------------------------|---------------------------------|----------------------|------------------------------------|---------------------------------|----------------------|
|                                   | Unmatched DAA non-users (N=2,844) | Matched DAA non-users (N=1,675) | P value <sup>b</sup> | Unmatched DAA non-users (N=23,685) | Matched DAA non-users (N=5,924) | P value <sup>b</sup> |
| Mean Age (SD)                     | 62.8 (10.7)                       | 62.1 (10.2)                     | 0.04                 | 59.2 (12.9)                        | 59.4 (11.7)                     | 0.34                 |
| <b>Age</b>                        |                                   |                                 |                      |                                    |                                 |                      |
| Age <65                           | 1,629 (57.3%)                     | 972 (58.0%)                     |                      | 1,574 (66.4%)                      | 3,714 (62.7%)                   |                      |
| Age 65-70                         | 496 (17.4%)                       | 364 (21.7%)                     |                      | 3,336 (14.1%)                      | 1,319 (22.3%)                   |                      |
| Age 70-75                         | 316 (11.1%)                       | 186 (11.1%)                     |                      | 1,890 (8.0%)                       | 551 (9.3%)                      |                      |
| Age >75                           | 403 (14.2%)                       | 153 (9.1%)                      | <0.001               | 2,754 (11.6%)                      | 340 (5.7%)                      | <0.001               |
| <b>Gender</b>                     |                                   |                                 |                      |                                    |                                 |                      |
| Female                            | 1,049 (36.9%)                     | 611 (36.5%)                     |                      | 10,297 (43.5%)                     | 2,470 (41.7%)                   |                      |
| Male                              | 1,795 (63.2%)                     | 1,064 (63.5%)                   | 0.78                 | 13,388 (56.5%)                     | 3,454 (58.3%)                   | 0.01                 |
| <b>Race</b>                       |                                   |                                 |                      |                                    |                                 |                      |
| White                             | 2022 (71.1%)                      | 1,217 (72.7%)                   |                      | 16,486 (69.6%)                     | 3,909 (66.0%)                   |                      |
| African American                  | 482 (16.9%)                       | 311 (18.6%)                     |                      | 5,174 (21.8%)                      | 1,634 (27.6%)                   |                      |
| Hispanic                          | 168 (5.9%)                        | 61 (3.6%)                       |                      | 811 (3.4%)                         | 164 (2.8%)                      |                      |
| Other                             | 162 (6.1%)                        | 86 (5.1%)                       | 0.003                | 1,214 (5.1%)                       | 217 (3.7%)                      | <0.001               |
| <b>Cirrhosis Type</b>             |                                   |                                 |                      |                                    |                                 |                      |
| Decompensated cirrhosis           | 1,350 (47.5%)                     | 518 (30.9%)                     |                      | -                                  | -                               |                      |
| Compensated cirrhosis             | 1,494 (52.5%)                     | 1,157 (69.1%)                   | <0.001               | -                                  | -                               |                      |
| <b>Conditions</b>                 |                                   |                                 |                      |                                    |                                 |                      |
| HIV/AIDS                          | 98 (3.5%)                         | 58 (3.5%)                       | 0.98                 | 1,121 (4.7%)                       | 466 (7.9%)                      | <0.001               |
| Hepatocellular cancer             | 245 (8.6%)                        | 137 (8.2%)                      | 0.61                 | 147 (0.6%)                         | 37 (0.6%)                       | 0.97                 |
| Anemia                            | 2,136 (75.1%)                     | 696 (41.6%)                     | <0.001               | 10,055 (42.4%)                     | 1,624 (27.4%)                   | <0.001               |
| Lung Disease                      | 1,322 (46.5%)                     | 499 (29.8%)                     | <0.001               | 9,289 (39.2%)                      | 1,511 (25.5%)                   | <0.001               |
| Cancer                            | 522 (18.4%)                       | 207 (12.4%)                     | <0.001               | 3,259 (13.8%)                      | 701 (11.8%)                     | <0.001               |
| Cardiac disease                   | 2,539 (89.3%)                     | 1,324 (79.0%)                   | <0.001               | 18,600 (78.5%)                     | 4,172 (70.4%)                   | <0.001               |
| Dementia                          | 497 (17.5%)                       | 87 (5.2%)                       | <0.001               | 2,741 (11.6%)                      | 272 (4.6%)                      | <0.001               |
| Psychiatric conditions            | 1,688 (59.3%)                     | 858 (51.2%)                     | <0.001               | 14,577 (61.6%)                     | 3,124 (52.7%)                   | <0.001               |
| Diabetes                          | 1,512 (53.2%)                     | 689 (41.1%)                     | <0.001               | 8,536 (36.0%)                      | 1,817 (30.7%)                   | <0.001               |
| Eye disease                       | 464 (16.3%)                       | 304 (18.2%)                     | 0.11                 | 3,445 (14.6%)                      | 1,051 (17.7%)                   | <0.001               |
| Kidney disorders                  | 1,531 (53.8%)                     | 557 (33.2%)                     | <0.001               | 7,631 (32.2%)                      | 1,395 (23.6%)                   | <0.001               |
| Drug and alcohol related disorder | 1,927 (67.8%)                     | 946 (56.5%)                     | <0.001               | 14,293 (60.3%)                     | 2,917 (49.2%)                   | <0.001               |
| Bone disease                      | 1,226 (43.1%)                     | 664 (39.6%)                     | 0.02                 | 10,007 (42.2%)                     | 2,549 (43.0%)                   | 0.28                 |
| ESRD                              | 359 (12.6%)                       | 69 (4.1%)                       | <0.001               | 1,987 (8.4%)                       | 242 (4.1%)                      | <0.001               |

Abbreviations: AIDS, Acquired immunodeficiency syndrome; DAA, Direct-acting antiviral drug; ESRD, End-stage renal disease; HIV, Human immunodeficiency virus;

<sup>a</sup> P values were calculated with unpaired, 2-tailed t tests for binary and continuous variables and  $\chi^2$  tests for categorical variables.

**eTable 5. Unadjusted Spending Over Time and Death Rates Between DAA Users and Non-Users**

|                                           | Pre-treatment <sup>a</sup>   | 6 months post <sup>b</sup> | 12 months post <sup>b</sup> | 18 months post <sup>b</sup> | 24 months post <sup>b</sup>           | 30 months post <sup>b</sup> |                   |
|-------------------------------------------|------------------------------|----------------------------|-----------------------------|-----------------------------|---------------------------------------|-----------------------------|-------------------|
| <b>Cirrhosis Group</b>                    |                              |                            |                             |                             |                                       |                             |                   |
| DAA Users (N)                             | 1,675                        | 1,675                      | 1,397                       | 1,015                       | 625                                   | 118                         |                   |
| DAA Non-users (N)                         | 1,675                        | 1,675                      | 1,288                       | 835                         | 431                                   | 164                         |                   |
| <i>HCV/Liver-related costs (Mean, SD)</i> |                              |                            |                             |                             |                                       |                             |                   |
| DAA Users                                 | \$3,422(12,155)              | \$2,511(11,002)            | \$1,872(9,462)              | \$1,672(6,601)              | \$1,910(8,602)                        | \$1,362(5,448)              |                   |
| DAA Non-users                             | \$2,328(7,449)               | \$2,955(11,218)            | \$2,587(11,398)             | \$2,533(10,176)             | \$1,953(7,237)                        | \$1,425(6,687)              |                   |
| <i>Total medical costs (Mean, SD)</i>     |                              |                            |                             |                             |                                       |                             |                   |
| DAA Users                                 | \$12,665(28,126)             | \$11,086(21,675)           | \$9,890(21,265)             | \$8,894(18,615)             | \$8,929(19,480)                       | \$9,389(15,987)             |                   |
| DAA Non-users                             | \$14,666(25,743)             | \$16,617(33,572)           | \$15,200(36,376)            | \$13,135(25,098)            | \$13,714(23,747)                      | \$10,782(25,048)            |                   |
| <i>Deaths (N, % among those at risk)</i>  |                              |                            |                             |                             |                                       |                             |                   |
| DAA Users                                 |                              |                            | 35(2.1%)                    | 41(2.9%)                    | 36(3.6%)                              | 8(1.3%)                     |                   |
| DAA Non-users                             |                              |                            | 120(7.2%)                   | 82(6.4%)                    | 32(3.8%)                              | 12(2.8%)                    |                   |
| <b>Non-Cirrhosis Group</b>                |                              |                            |                             |                             |                                       |                             |                   |
| DAA Users (N)                             | 5,924                        | 5,924                      | 5,014                       | 3,869                       | 2,375                                 | 519                         |                   |
| DAA Non-users (N)                         | 5,924                        | 5,924                      | 4,898                       | 3,536                       | 2,012                                 | 579                         |                   |
| <i>HCV/Liver-related costs (Mean, SD)</i> |                              |                            |                             |                             |                                       |                             |                   |
| DAA Users                                 | \$879(4,336)                 | \$311(2,024)               | \$230(2,255)                | \$170(1,246)                | \$173(1,420)                          | \$136(794)                  |                   |
| DAA Non-users                             | \$260(2,691)                 | \$289(3,989)               | \$255(3,393)                | \$237(1,952)                | \$220(3,048)                          | \$163(999)                  |                   |
| <i>Total medical costs (Mean, SD)</i>     |                              |                            |                             |                             |                                       |                             |                   |
| DAA Users                                 | \$7,911(20,074)              | \$7,881(24,769)            | \$7,425(22,483)             | \$7,361(26,036)             | \$6,949(22,170)                       | \$7,893(40,140)             |                   |
| DAA Non-users                             | \$10,614(27,715)             | \$11,406(36,713)           | \$10,605(33,475)            | \$10,461(42,222)            | \$10,679(62,014)                      | \$10,159(38,098)            |                   |
| <i>Deaths (N, % among those at risk)</i>  |                              |                            |                             |                             |                                       |                             |                   |
| DAA Users                                 |                              |                            | 37(0.6%)                    | 43(0.9%)                    | 43(1.1%)                              | 11(0.5%)                    |                   |
| DAA Non-users                             |                              |                            | 121(2.0%)                   | 127(2.6%)                   | 61(1.7%)                              | 20(1.0%)                    |                   |
|                                           | <b>6-month pre-treatment</b> |                            | <b>6-month treatment</b>    |                             | <b>Average 6-month post-treatment</b> |                             | <b>Drug Costs</b> |
|                                           | <b>HCV/Liver costs</b>       | <b>Non-HCV/Liver costs</b> | <b>HCV/Liver costs</b>      | <b>Non-HCV/Liver costs</b>  | <b>HCV/Liver costs</b>                | <b>Non-HCV/Liver costs</b>  |                   |
|                                           | Mean (SD)                    | Mean (SD)                  | Mean (SD)                   | Mean (SD)                   | Mean (SD)                             | Mean (SD)                   | Mean (SD)         |
| <b>Cirrhosis Group</b>                    |                              |                            |                             |                             |                                       |                             |                   |
| DAA Incomplete                            | \$6,398(36,660)              | \$10,403(17,653)           | \$3,554(8,039)              | \$8,756(19,610)             | \$2,830(9,219)                        | \$9,922(15,304)             | \$82,973(40,994)  |
| DAA Users                                 | \$3,422(12,155)              | \$9,242(22,741)            | \$2,186(5,838)              | \$7,755(21,711)             | \$2,337(9,380)                        | \$8,709(15,093)             | \$102,634(44,184) |
| DAA Non-users                             | \$2,328(7,449)               | \$12,338(24,060)           | \$2,511(11,002)             | \$12,974(27,870)            | \$2,974(9,008)                        | \$13,680(27,654)            | -                 |
| <b>Non-Cirrhosis Group</b>                |                              |                            |                             |                             |                                       |                             |                   |
| DAA Incomplete                            | \$884(1,766)                 | \$8,625(21,495)            | \$866(3,474)                | \$10,288(23,800)            | \$621(969)                            | \$9,312(16,933)             | \$71,768(41,852)  |
| DAA Users                                 | \$879(4,336)                 | \$7,033(19,339)            | \$620(1,745)                | \$6,560(19,782)             | \$269(1,613)                          | \$7,830(22,401)             | \$80,898(27,526)  |

|               |              |                  |              |                  |              |                  |   |
|---------------|--------------|------------------|--------------|------------------|--------------|------------------|---|
| DAA Non-users | \$260(2,691) | \$10,354(27,493) | \$311(2,024) | \$10,075(39,755) | \$279(2,761) | \$11,314(34,040) | - |
|---------------|--------------|------------------|--------------|------------------|--------------|------------------|---|

Abbreviations: DAA, Direct-acting antiviral drug; HCV, Hepatitis C virus; SD, Standard deviation;

<sup>a</sup> Pre-treatment among users refers to the 6-month period prior to initiation of DAAs among users, and among non-users it refers to the 6-month period prior to the assigned index date.

<sup>b</sup> Post refers periods after completion of DAA therapy among users, and among non-users it refers to the period after hypothetical treatment.

**eTable 6.** Results from Regression With Patients That Survived During Follow-Up<sup>a</sup>

|                                     | Among cirrhosis group (N=11,267) |         | Among non-cirrhosis group (N=44,813) |         |
|-------------------------------------|----------------------------------|---------|--------------------------------------|---------|
|                                     | Users vs. Non-Users              | P Value | Users vs. Non-Users                  | P Value |
|                                     | Differences (95% CI)             |         | Differences (95% CI)                 |         |
| <b>HCV/Liver-related costs (\$)</b> |                                  |         |                                      |         |
| <i>Time after treatment</i>         |                                  |         |                                      |         |
| 6-months                            | -2,039 (-2,783 to -1,296)        | <0.001  | -432 (-533 to -331)                  | <0.001  |
| 12-months                           | -1,800 (-2,601 to -1,000)        | <0.001  | -547 (-656 to -438)                  | <0.001  |
| 18-months                           | -1,489 (-2,358 to -621)          | 0.001   | -510 (-612 to -407)                  | <0.001  |
| 24-months                           | -346 (-1,567 to 874)             | 0.58    | -401 (-497 to -305)                  | <0.001  |
| 30-months                           | -1,388 (-2,520 to -257)          | 0.02    | -351 (-458 to -244)                  | <0.001  |
| <b>Total medical costs (\$)</b>     |                                  |         |                                      |         |
| <i>Time after treatment</i>         |                                  |         |                                      |         |
| 6-months                            | -2,438 (-4,335 to -540)          | 0.01    | -1,121 (-2,117 to -124)              | 0.03    |
| 12-months                           | -995 (-2,826 to 836)             | 0.29    | -1,620 (-2,650 to -589)              | 0.002   |
| 18-months                           | 244 (-1,874 to 2,362)            | 0.82    | -1,873 (-4,042 to 296)               | 0.09    |
| 24-months                           | -924 (-4,290 to 2,442)           | 0.59    | -1,350 (-3,111 to 411)               | 0.13    |
| 30-months                           | 1,235 (-3,198 to 5,669)          | 0.59    | -827 (-4,249 to 2,595)               | 0.64    |

Abbreviations: CI, Confidence intervals; DAA, Direct-acting antiviral drug; HCV, Hepatitis C virus;

<sup>a</sup> Multivariate regression was used to examine the association of DAA treatment with spending outcomes in patients that survived during follow-up period. Changes in medical costs were compared between DAA users and non-users over 30 months of follow-up after the completion of DAA treatment using a difference-in-differences approach. eAppendix 3 provides further details of the regression model and describes the variables used in the model.

**eTable 7. Unadjusted Spending Among DAA Users by Time-to-Treatment**

|                                           | 6 months after diagnosis | Pre-treatment <sup>a</sup> | 6 months post <sup>b</sup> | 12 months post <sup>b</sup> | 18 months post <sup>b</sup> | 24 months post <sup>b</sup> |
|-------------------------------------------|--------------------------|----------------------------|----------------------------|-----------------------------|-----------------------------|-----------------------------|
| <b>Cirrhosis Group</b>                    |                          |                            |                            |                             |                             |                             |
| Use ≤ 1yr of diagnosis (N)                | 598                      | 598                        | 598                        | 564                         | 537                         | 433                         |
| Use > 1yr of diagnosis (N)                | 1,077                    | 1,077                      | 1,077                      | 833                         | 478                         | 192                         |
| <i>HCV/Liver-related costs (Mean, SD)</i> |                          |                            |                            |                             |                             |                             |
| Use ≤ 1yr of diagnosis                    | \$3,344 (8,582)          | \$3,042 (8,029)            | \$2,810 (11,587)           | \$1,851 (9,888)             | \$1,476 (6,571)             | \$1,877 (9,380)             |
| Use > 1yr of diagnosis                    | \$2,083 (8,034)          | \$3,634 (13,927)           | \$2,345 (10,665)           | \$1,886 (9,169)             | \$1,893 (6,634)             | \$1,985 (6,536)             |
| <i>Total medical costs (Mean, SD)</i>     |                          |                            |                            |                             |                             |                             |
| Use ≤ 1yr of diagnosis                    | \$12,008 (20,736)        | \$9,970 (19,528)           | \$10,017 (21,009)          | \$8,778 (18,991)            | \$8,319 (15,642)            | \$9,223 (21,376)            |
| Use > 1yr of diagnosis                    | \$12,980 (23,849)        | \$14,161 (31,826)          | \$11,680 (22,023)          | \$10,643 (22,655)           | \$9,539 (21,468)            | \$8,265 (14,339)            |
| <b>Non-Cirrhosis Group</b>                |                          |                            |                            |                             |                             |                             |
| Use ≤ 1yr of diagnosis (N)                | 2,326                    | 2,326                      | 2,326                      | 2,247                       | 2,161                       | 1,802                       |
| Use > 1yr of diagnosis (N)                | 3,598                    | 3,598                      | 3,598                      | 2,767                       | 1,708                       | 573                         |
| <i>HCV/Liver-related costs (Mean, SD)</i> |                          |                            |                            |                             |                             |                             |
| Use ≤ 1yr of diagnosis                    | \$909 (2,202)            | \$824 (1,561)              | \$280 (1,481)              | \$248 (2,800)               | \$170 (1,218)               | \$185 (1,542)               |
| Use > 1yr of diagnosis                    | \$677 (2,695)            | \$914 (542)                | \$332 (2,308)              | \$215 (1,689)               | \$171 (1,280)               | \$135 (937)                 |
| <i>Total medical costs (Mean, SD)</i>     |                          |                            |                            |                             |                             |                             |
| Use ≤ 1yr of diagnosis                    | \$9,145 (28,162)         | \$7,073 (21,987)           | \$6,537 (19,968)           | \$6,781 (20,430)            | \$7,088 (25,873)            | \$7,202 (24,594)            |
| Use > 1yr of diagnosis                    | \$11,487 (28,737)        | \$8,453 (18,717)           | \$8,751 (27,396)           | \$7,948 (24,013)            | \$7,708 (26,244)            | \$6,152 (11,603)            |

Abbreviations: DAA, Direct-acting antiviral drug; HCV, Hepatitis C virus; SD, Standard deviation;

<sup>a</sup> Pre-treatment refers to the 6-month period prior to initiation of DAAs among users.

<sup>b</sup> Post refers periods after completion of DAA therapy among users.

**eTable 8.** Adjusted Outcomes Associated With DAA Use by Time to Treatment from HCV Diagnosis (by Cirrhosis)<sup>a</sup>

|                                     | Among cirrhosis group (N=12,573) |         | Among non-cirrhosis group (N=46,498) |         |
|-------------------------------------|----------------------------------|---------|--------------------------------------|---------|
|                                     | Users vs. Non-Users              | P Value | Users vs. Non-Users                  | P Value |
|                                     | Differences (95% CI)             |         | Differences (95% CI)                 |         |
| <b>HCV/Liver-related costs (\$)</b> |                                  |         |                                      |         |
| <i>6-months<sup>b</sup></i>         |                                  |         |                                      |         |
| Use ≤1yr of diagnosis               | -2,459 (-3,596 to -1,321)        | <0.001  | -520 (-656 to -385)                  | <0.001  |
| Use > 1yr of diagnosis              | -2,558 (-3,525 to -1,590)        | <0.001  | -480 (-606 to -355)                  | <0.001  |
| <i>12-months</i>                    |                                  |         |                                      |         |
| Use ≤1yr of diagnosis               | -2,632 (-3,800 to -1,465)        | <0.001  | -667 (-813 to -522)                  | <0.001  |
| Use > 1yr of diagnosis              | -2,234 (-3,306 to -1,163)        | <0.001  | -587 (-722 to -452)                  | <0.001  |
| <i>18-months</i>                    |                                  |         |                                      |         |
| Use ≤1yr of diagnosis               | -2,237 (-3,380 to -1,094)        | <0.001  | -577 (-711 to -542)                  | <0.001  |
| Use > 1yr of diagnosis              | -1,387 (-2,558 to -216)          | 0.02    | -574 (-701 to -446)                  | <0.001  |
| <i>24-months</i>                    |                                  |         |                                      |         |
| Use ≤1yr of diagnosis               | -135 (-2,185 to 1,915)           | 0.90    | -458 (-590 to -327)                  | <0.001  |
| Use > 1yr of diagnosis              | -1,298 (-2,343 to -253)          | 0.02    | -499 (-625 to -374)                  | <0.001  |
| <i>30-months</i>                    |                                  |         |                                      |         |
| Use ≤1yr of diagnosis               | -1,689 (-3,110 to -268)          | 0.02    | -396 (-528 to -264)                  | <0.001  |
| <b>Total medical costs (\$)</b>     |                                  |         |                                      |         |
| <i>6-months</i>                     |                                  |         |                                      |         |
| Use ≤1yr of diagnosis               | -2,718 (-5,333 to -102)          | 0.04    | -1,852 (-3,086 to -618)              | <0.001  |
| Use > 1yr of diagnosis              | -2,959 (-5,037 to -882)          | 0.01    | -905 (-1,984 to 174)                 | 0.10    |
| <i>12-months</i>                    |                                  |         |                                      |         |
| Use ≤1yr of diagnosis               | -1,967 (-4,564 to 628)           | 0.14    | -2,288 (-3,515 to -1,060)            | <0.001  |
| Use > 1yr of diagnosis              | -2,135 (-4,283 to 12)            | 0.05    | -1,181 (-2,354 to -8)                | 0.05    |
| <i>18-months</i>                    |                                  |         |                                      |         |
| Use ≤1yr of diagnosis               | 499 (-2,387 to 3,385)            | 0.74    | -2,381 (-4,625 to -138)              | 0.04    |
| Use > 1yr of diagnosis              | -108 (-2,302 to 2,085)           | 0.92    | -1,340 (-3,694 to 1,014)             | 0.26    |
| <i>24-months</i>                    |                                  |         |                                      |         |
| Use ≤1yr of diagnosis               | -193 (-4,303 to 3,917)           | 0.93    | -1,541 (-3,439 to 358)               | 0.11    |
| Use > 1yr of diagnosis              | -3,338 (-6,769 to 93)            | 0.06    | -1,754 (-3,667 to 158)               | 0.07    |
| <i>30-months</i>                    |                                  |         |                                      |         |
| Use ≤1yr of diagnosis               | 1,099 (-3,834 to 6,033)          | 0.66    | -947 (-4,268 to 2,374)               | 0.58    |

Abbreviations: CI, Confidence intervals; DAA, Direct-acting antiviral drug; HCV, Hepatitis C virus;

<sup>a</sup> The DAA users were grouped into two categories by time-to-DAA initiation: within 12 months and after 12 months. Then, the changes in medical costs were compared between each of these two categories and non-users. The model controlled for common time trends, permanent differences across categories of DAA users, and patient characteristics.

<sup>b</sup> All periods refer to periods after completion of DAA therapy among users, and among non-users it refers to the period after hypothetical treatment.
